# Supplementary material for: An indirect competitive assay-based method for the sensitive determination of tetracycline residue using a real-time fluorescence-based quantitative polymerase chain reaction
Source: Royal Society of Chemistry journal article supplement (doi:10.1039/d3ay01072d), 2023-01-01
Supplement: d3ay01072d1.pdf [file d3ay01072d1.pdf]

## Supplementary Material

### **An indirect competitive assay-based method for the sensitive determination of tetracycline residue using a real-time fluorescence-based quantitative polymerase chain reaction**

Tianying Sheng, Hanyu Chen\*, Yingying, Lei, Baozhong Zhang, Huina Zhu

School of Environmental Engineering, Henan University of Technology, Zhengzhou 450001, PR China.

\* Corresponding author.

Telephone: +86 18623716700;

Fax: +86-0371-67756718;

E-mail: chy071@haut.edu.cn (H.Y. Chen);

Present address: School of Environment Engineering, Henan University of Technology, 100 Lianhua Road, Zhengzhou 450001, PR China.

**Table S1** Design of experiments for response surface methodology.

| Factor | Name  | Units | Low | High |
|--------|-------|-------|-----|------|
| A      | Apt40 | nM    | 100 | 125  |
| B      | sDNA  | nM    | 100 | 125  |
| C      | cDNA  | nM    | 75  | 100  |

**Table S2** Variance analysis for the established regression model.

| Source                         | Sum of Squares | df <sup>a</sup> | Mean Square | F Value | P-value<br>Prob > F | Significance <sup>b</sup> |
|--------------------------------|----------------|-----------------|-------------|---------|---------------------|---------------------------|
| Model                          | 2.52           | 9               | 0.28        | 86.60   | <0.0001             | **                        |
| A                              | 0.021          | 1               | 0.021       | 6.51    | 0.0381              | *                         |
| B                              | 0.25           | 1               | 0.25        | 76.96   | <0.0001             | **                        |
| C                              | 0.11           | 1               | 0.11        | 34.20   | 0.0006              | **                        |
| AB                             | 0.71           | 1               | 0.71        | 218.50  | <0.0001             | **                        |
| AC                             | 0.0056         | 1               | 0.0056      | 1.74    | 0.2284              |                           |
| BC                             | 0.11           | 1               | 0.11        | 32.71   | 0.0007              | **                        |
| A <sup>2</sup>                 | 0.71           | 1               | 0.71        | 220.79  | <0.0001             | **                        |
| B <sup>2</sup>                 | 0.45           | 1               | 0.45        | 138.99  | <0.0001             | **                        |
| C <sup>2</sup>                 | 0.050          | 1               | 0.050       | 15.49   | 0.0056              | **                        |
| Residual                       | 0.023          | 7               | 0.0032      |         |                     |                           |
| Lack of Fit                    | 0.017          | 3               | 0.0057      | 4.17    | 0.1008              |                           |
| Pure Error                     | 0.0055         | 4               | 0.0014      |         |                     |                           |
| Cor Total                      | 2.54           | 16              |             |         |                     |                           |
| R <sup>2</sup>                 |                |                 |             |         | 0.9911              |                           |
| R <sup>2</sup> <sub>Adj</sub>  |                |                 |             |         | 0.9797              |                           |
| R <sup>2</sup> <sub>pred</sub> |                |                 |             |         | 0.8887              |                           |

<sup>a</sup> df: degree of freedom.

<sup>b</sup> \*\*: highly significant; \*: significant.

**Table S3** Comparison of several previously reported methods for tetracycline detection and the method developed in the present study.

| Label                                 | Analytical technique                 | LOD <sup>a</sup><br>(ng/mL) | Linear range<br>(ng/mL)           | Ref.          |
|---------------------------------------|--------------------------------------|-----------------------------|-----------------------------------|---------------|
| G-quadruplex                          | Colorimetric                         | 1.47                        | -                                 | 1             |
| Upconversion<br>nanosensor            | Fluorescence sensor                  | 0.17                        | 0.5-10 <sup>3</sup>               | 2             |
| Polydimethylsiloxane<br>plasma cavity | Surface-enhanced<br>Raman scattering | 0.28                        | 15-55                             | 3             |
| Au NPs@MoS <sub>2</sub> /Ch           | Electrochemical                      | 13.33                       | 2.22 × 10 <sup>-3</sup> -0.49     | 4             |
| Aptamer-based<br>competition          | Fluorescent                          | 7.02 × 10 <sup>-5</sup>     | 10 <sup>-3</sup> -10 <sup>3</sup> | Present study |

<sup>a</sup> LOD: the limit of detection.

## References

- 1 Y. Tang, X. Huang, X. Wang, C. Wang, H. Tao and Y. Wu, *Food Chem.*, 2022, 366, 130560.
- 2 Y. Zhang, M. Mehedi Hassan, Y. Rong, R. Liu, H. Li, Q. Ouyang and Q. Chen, *Food Chem.*, 2022, 373, 131497.
- 3 Z. Yang, C. Ma, J. Gu, Y. Wu, C. Zhu, L. Li, H. Gao, Y. Zhang, Y. Shang, C. Wang and G. Chen, *Appl. Spectrosc.*, 2021, 75, 589–595.
- 4 H. Xu, D. Zhang, X. Weng, D. Wang and D. Cai, *Microchim. Acta*, 2022, 189, 201
